# Supplementary material for: The E–Id protein axis modulates the activities of the PI3K–AKT–mTORC1–Hif1a and c-myc/p19Arf pathways to suppress innate variant TFH cell development, thymocyte expansion, and lymphomagenesis
Source: PubMed Central journal article supplement (PMC4335296; doi:10.1101/gad.255331.114), 2015-02-15
Supplement: supp_29.4.409_SuppFigs.pdf [file supp_29.4.409_SuppFigs.pdf]

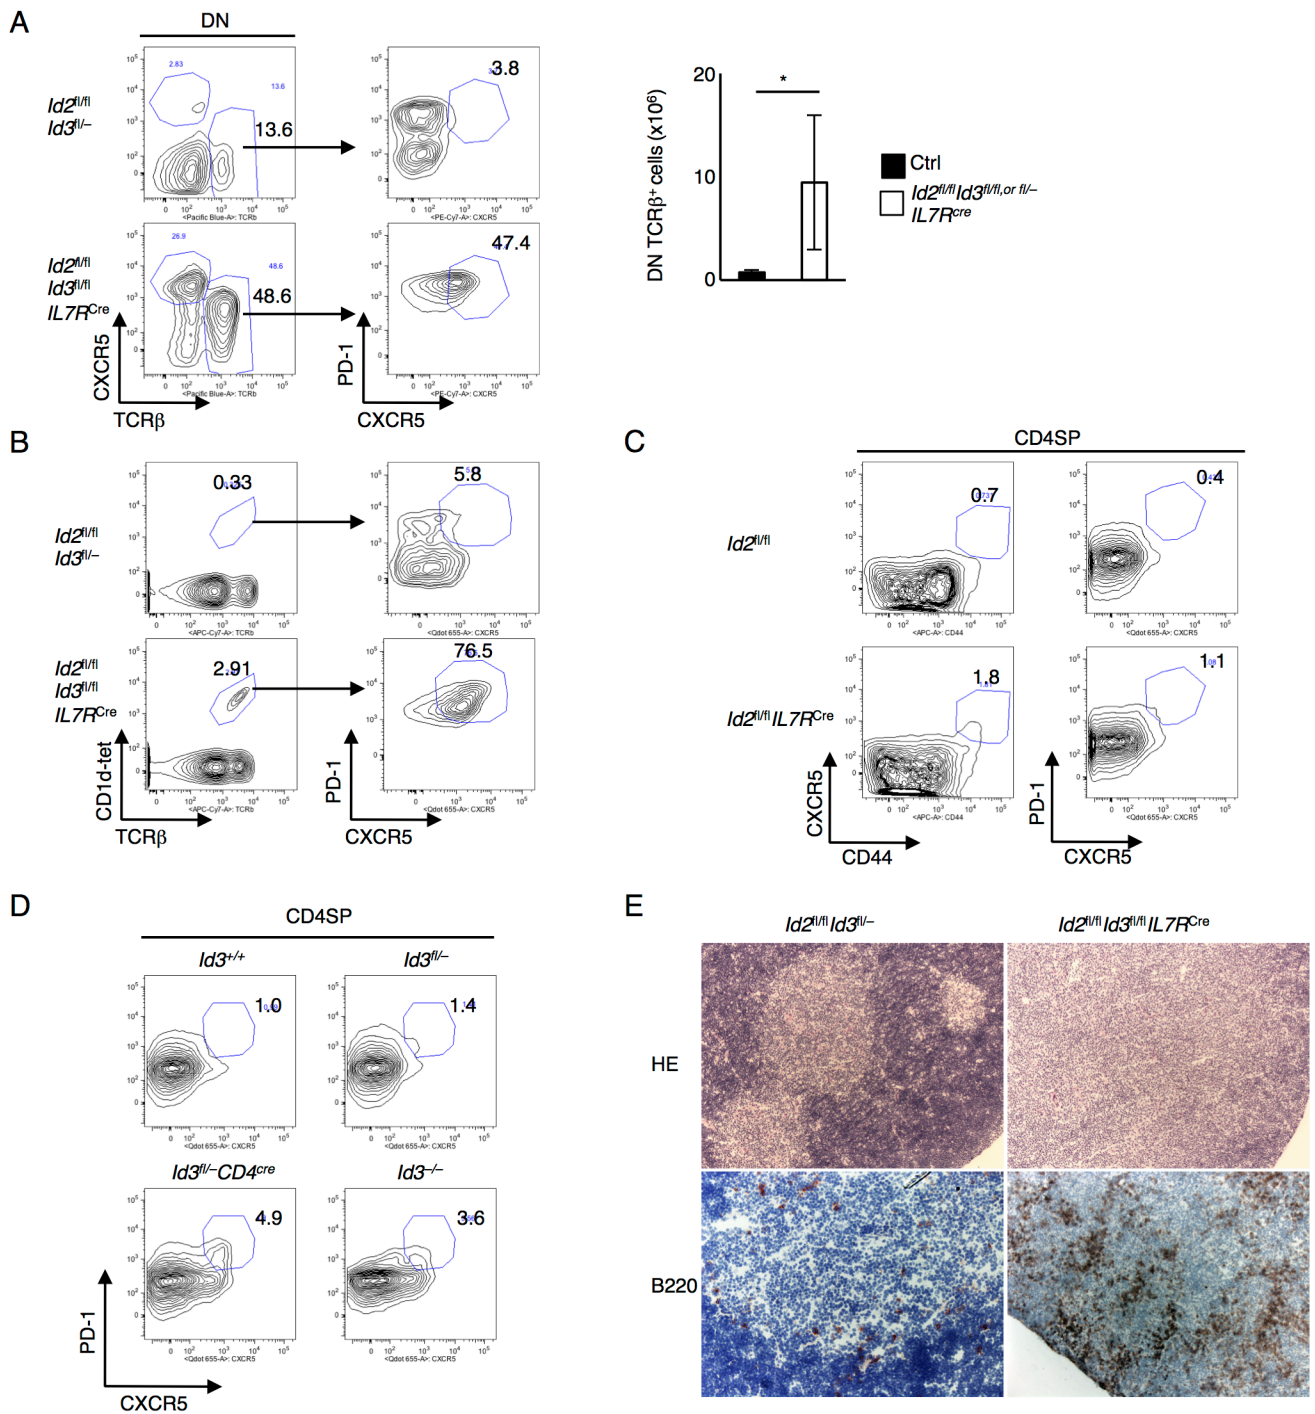

Figure S1. Related to Figure 1. The development of innate  $T_{FH}$ -like cells in thymi derived from  $Id2^{fl/fl}Id3^{fl/fl}IL7R^{Cre}$  mice. (A) Flow cytometric analysis of CXCR5 versus TCR $\beta$  expression gated on CD4<sup>-</sup>CD8<sup>-</sup> (DN) thymocytes, and CXCR5 versus PD-1 expression gated on DN;TCR $\beta$ <sup>+</sup> cells derived from 5-week-old  $Id2^{fl/fl}Id3^{fl/fl}IL7R^{Cre}$  thymus. Graph shows absolute numbers of DN;TCR $\beta$ <sup>+</sup> cells.  $\star$ ,  $P < 0.05$  (Student's  $t$  test). (B) Flow cytometric analysis of TCR $\beta$  versus CD1d-tet expression in total thymocytes, and CXCR5 versus PD-1 expression gated on CD1d-tet<sup>+</sup>TCR $\beta$ <sup>+</sup> iNKT cells. (C) Flow cytometric analysis of CXCR5 versus CD44 expression, and CXCR5 versus PD-1 expression, gated on CD4SP cells derived from  $Id2^{fl/fl}IL7R^{Cre}$  thymi. (D) CXCR5 versus PD-1 expression gated on CD4SP cells derived from control ( $Id3^{+/+}$  and  $Id3^{fl/fl}$ ),  $Id3^{fl/fl}CD4^{Cre}$ , and  $Id3^{-/-}$  mice. (E) Representative hematoxylin-eosin staining (HE; top) and immunostaining directed against B220 (bottom) from 5-week-old  $Id2^{fl/fl}Id3^{fl/fl}IL7R^{Cre}$  or littermate control mice. Original magnification:  $\times 100$ .

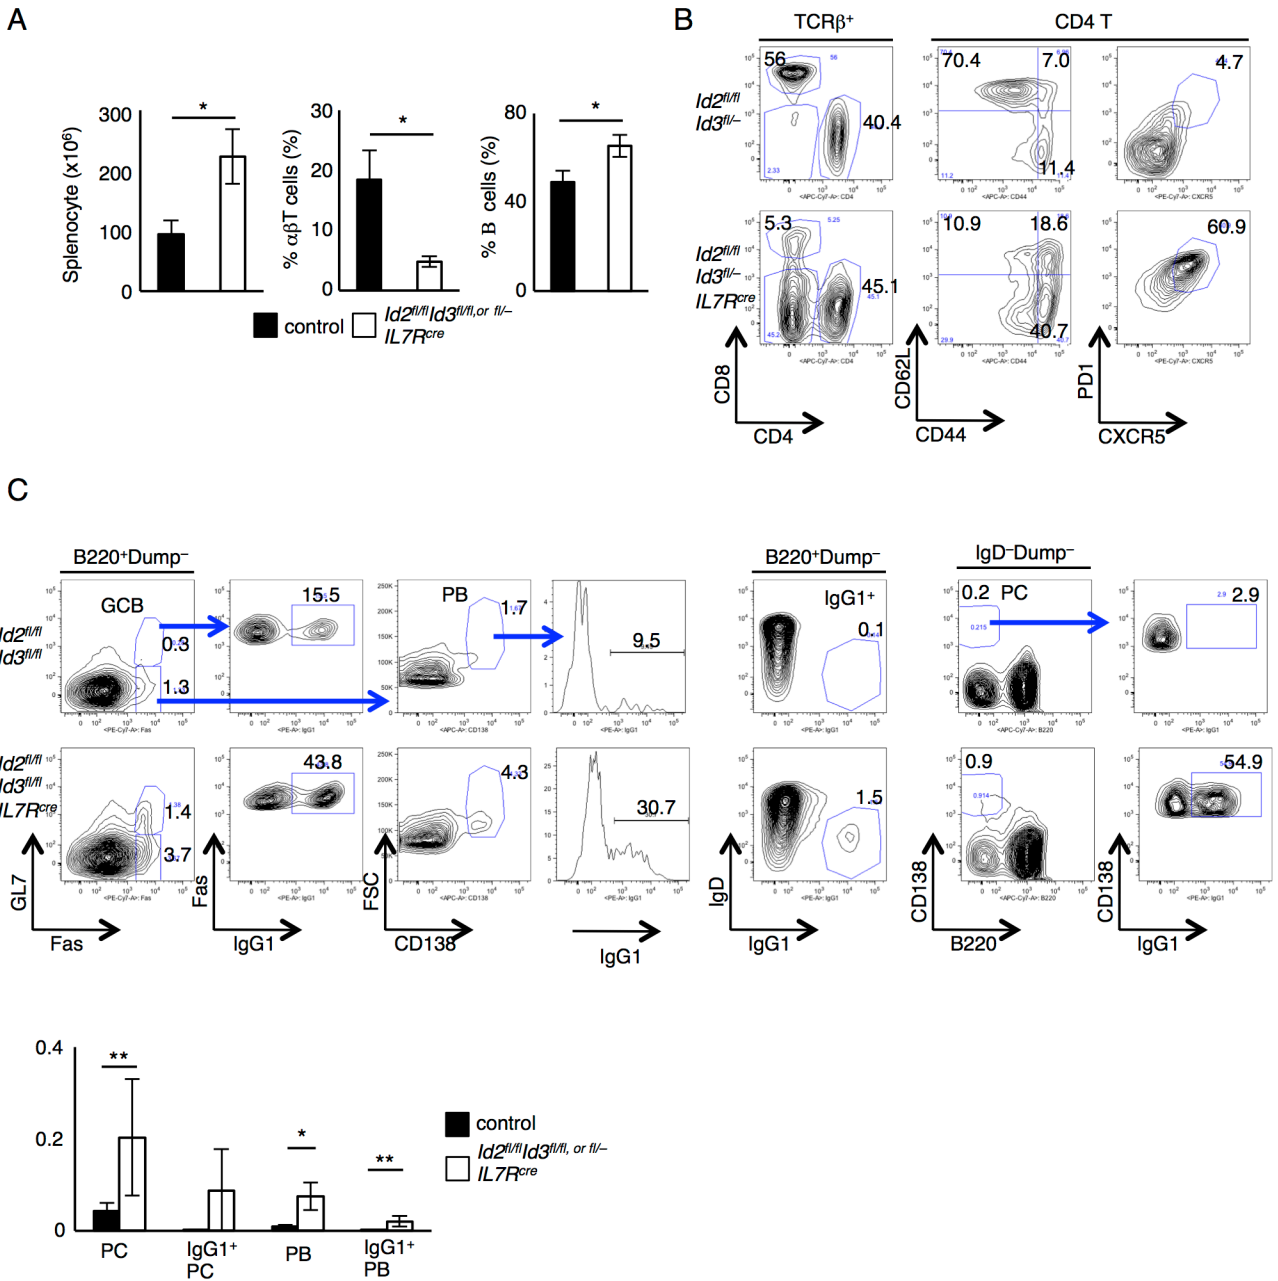

Figure S2. Related to Figure 1. T<sub>FH</sub> cells, and IgG1-class switched and germinal center B cells in the spleen derived from 5-week-old *Id2<sup>fl/fl</sup>Id3<sup>fl/fl</sup>IL7R<sup>Cre</sup>* mice. (A) Absolute number of splenocytes and frequency of  $\alpha\beta$ T cells and B cells in spleen. (B) Flow cytometric analysis of CD4 versus CD8 gated on TCR $\beta^+$  T cells, and CD44 versus CD62L expression and CXCR5 versus PD-1 expression, gated on CD4 T cells in the spleen. (C) Flow cytometric analysis of GC B cells (Fas<sup>+</sup>GL7<sup>+</sup>), IgG1-class switched GC B cells, Plasma blast cells (PB)(Fas<sup>+</sup>GL7<sup>-</sup>CD138<sup>+</sup>large cell), IgG1-class switched PB, IgG1 class switched B cells (IgG1<sup>+</sup>) (IgG1<sup>+</sup>IgD<sup>-</sup>), Plasma cell (PC) (IgD-Dump-B220-CD138<sup>+</sup>), and IgG1-class switched PC. \*,  $P < 0.05$ , \*\*,  $P < 0.01$  (Student's  $t$  test).

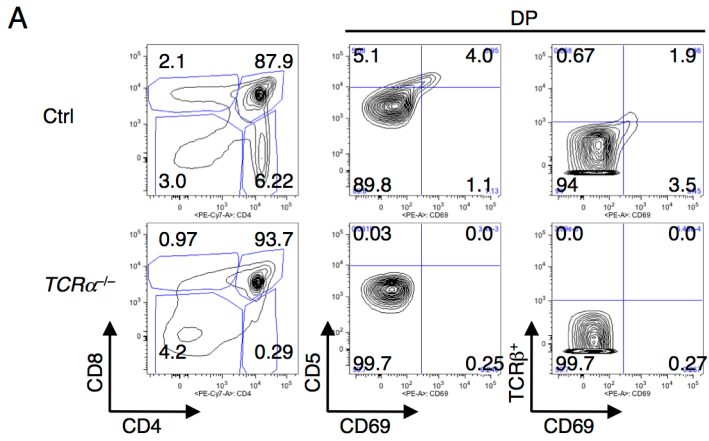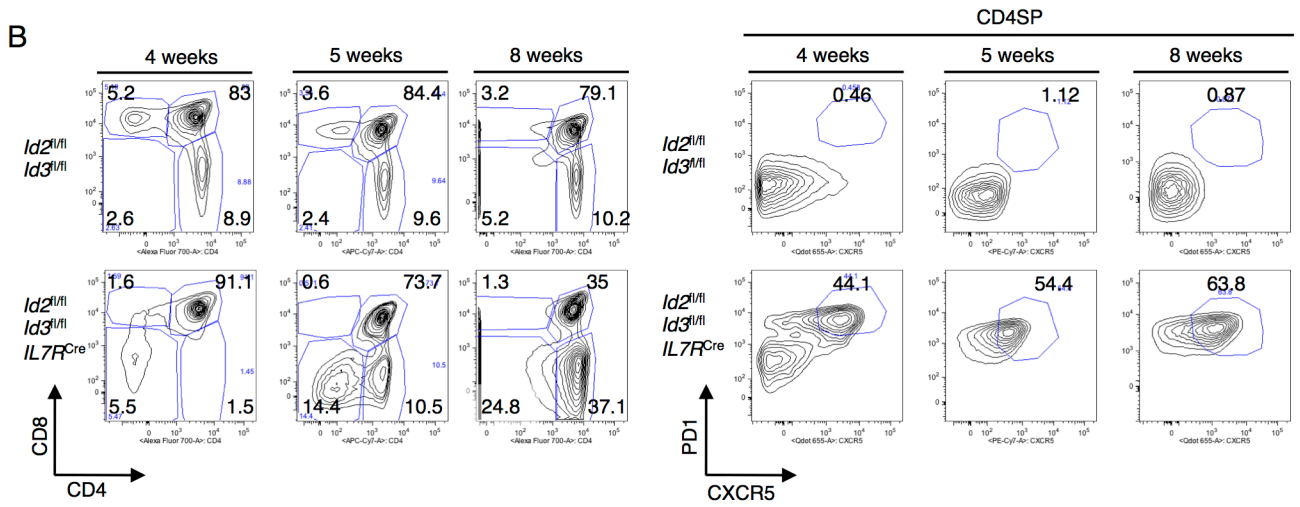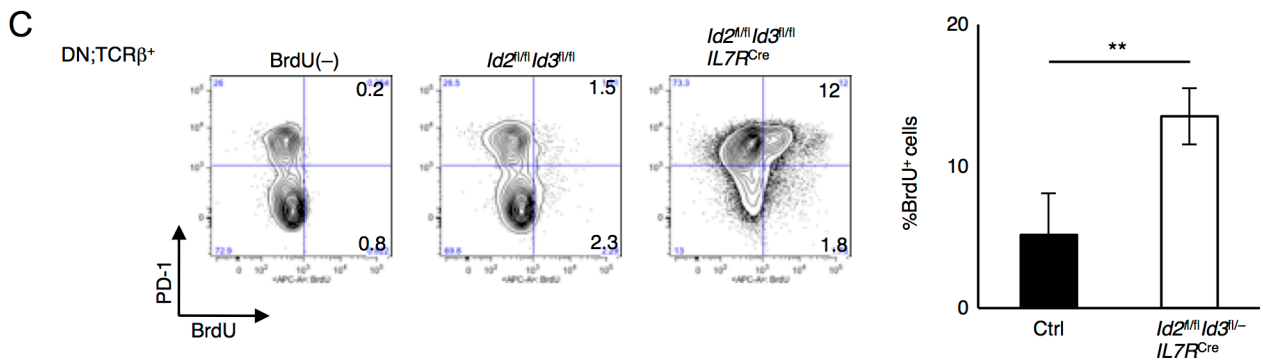

D

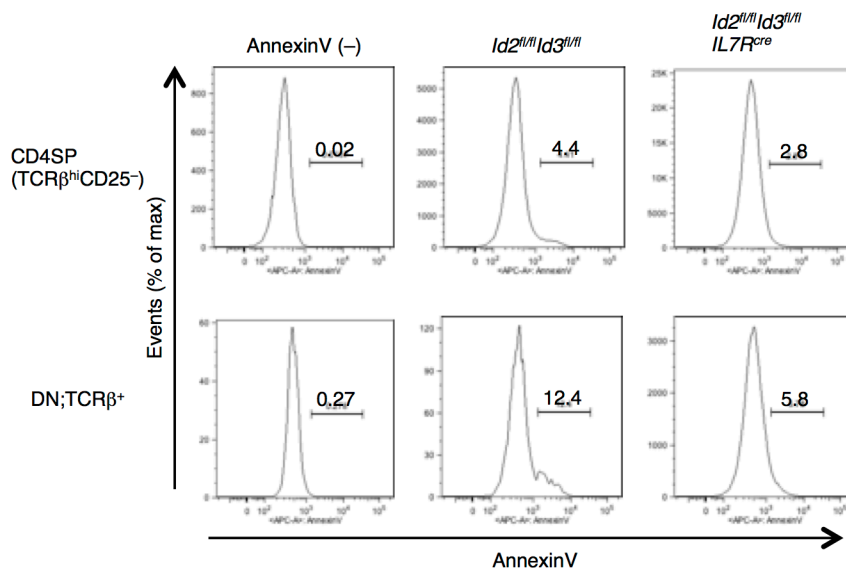

E

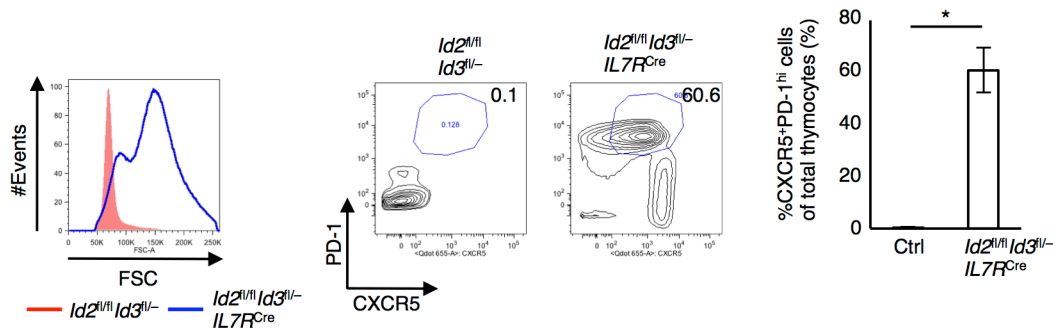

Figure S3. Related to Figure 3. Expansion and increased cell size of CXCR5<sup>+</sup>PD-1<sup>+</sup> CD4SP cells in *Id2<sup>fl/fl</sup>Id3<sup>fl/fl</sup>IL7R<sup>cre</sup>* thymi. (A) Flow cytometric analysis of CD4 versus CD8 expression gated on total thymocytes, CD69 versus CD5 expression and CD69 versus TCRβ expression, gated on CD4<sup>+</sup>CD8<sup>+</sup> DP cells, derived from TCRα<sup>-/-</sup> thymus. (B) Expression of CD4 versus CD8 in total thymocytes, and CXCR5 versus PD-1 gated on CD4SP cells, derived from 4-, 5-, and 8-week-old control or *Id2<sup>fl/fl</sup>Id3<sup>fl/fl</sup>IL7R<sup>cre</sup>* mice. (C) BrdU incorporation in DN;TCRβ<sup>+</sup> cells derived from *Id2<sup>fl/fl</sup>Id3<sup>fl/fl</sup>IL7R<sup>cre</sup>* and *Id2<sup>fl/fl</sup>Id3<sup>fl/fl</sup>* mice. Numbers adjacent in quadrants indicate percentages of cells in each. Lower panel indicates frequency of cells that incorporate BrdU. Data represent the mean ± SD from four mice. \*\*, *P* < 0.01 (Student's *t* test). Data are representative from three independent experiments with three or four 8-10 week-old mice each. (D) AnnexinV staining in CD4SP and DN;TCRβ<sup>+</sup> cells. Numbers above lines indicate fraction of AnnexinV<sup>+</sup> cells. (E) Flow cytometric analysis of cell size and CXCR5 versus PD-1 expression gated on total thymocytes derived from 6-month-old littermate or *Id2<sup>fl/fl</sup>Id3<sup>fl/fl</sup>IL7R<sup>cre</sup>* mice. Graph shows the frequency of CXCR5<sup>+</sup>PD-1<sup>+</sup> cells of total thymocytes in 6-month-old *Id2<sup>fl/fl</sup>Id3<sup>fl/fl</sup>IL7R<sup>cre</sup>* mice. Data represent the mean ± SD from three mice. \*, *P* < 0.05, (Student's *t* test).

A

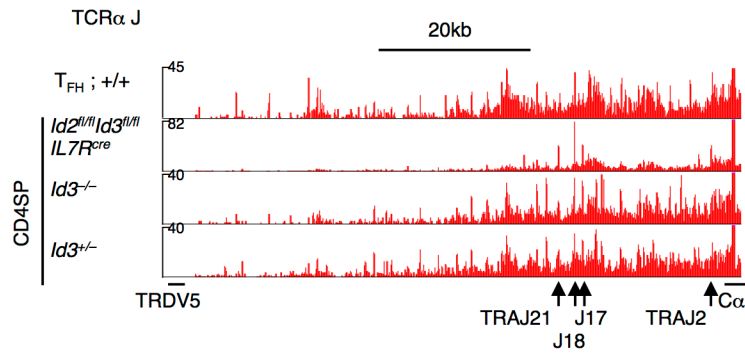

B

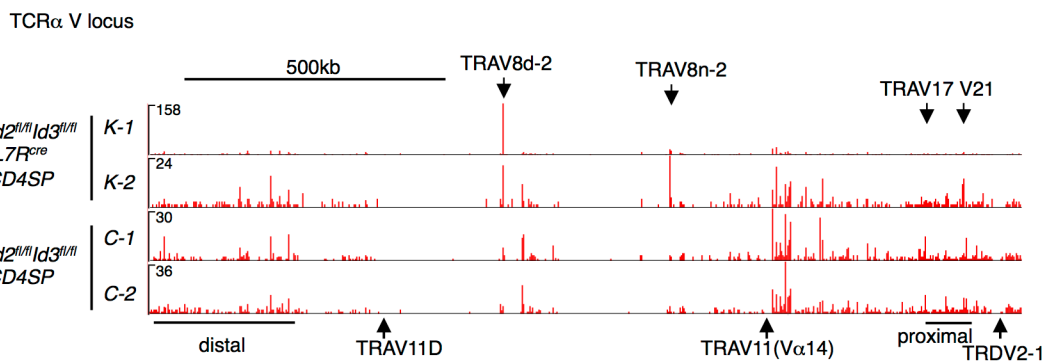

C

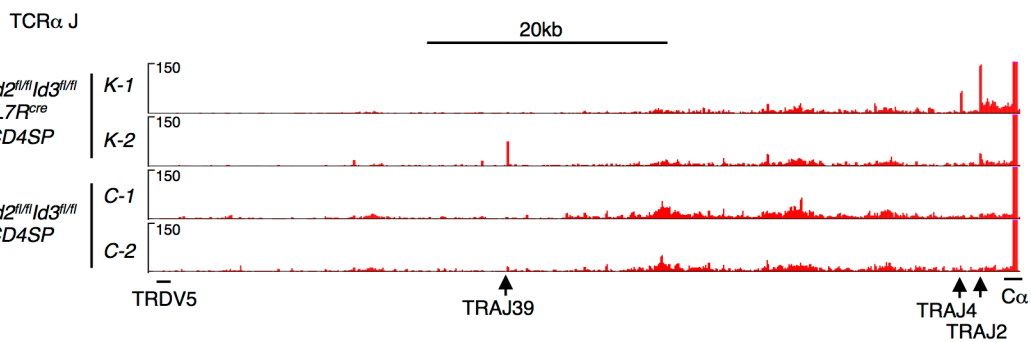

D

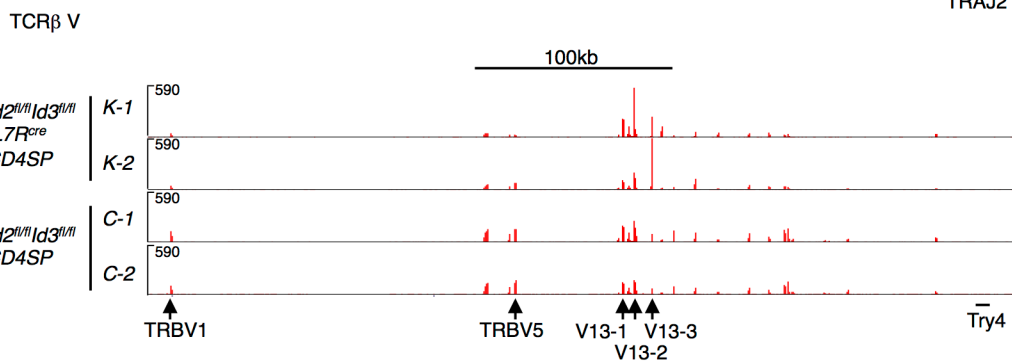

Figure S4. Related to Figure 3. Highly restricted TCR $\alpha$  and TCR $\beta$  repertoire in CD4SP cells isolated from  $Id2^{fl/fl} Id3^{fl/fl} IL7R^{cre}$  mice. (A) RNA-Seq analysis across the TCR J $\alpha$  region, as seen in Figure 3G,H.. (B) RNA-seq analysis across the TCR V $\alpha$  region. (C) RNA-Seq analysis across the TCR J $\alpha$  region. (D) RNA-Seq analysis across the TCR $\beta$  V region. (B-D) RNA was isolated from CD4SP cells derived from  $Id2^{fl/fl} Id3^{fl/fl} IL7R^{cre}$  (K-1, K-2) and control (C-1, C-2) mice.

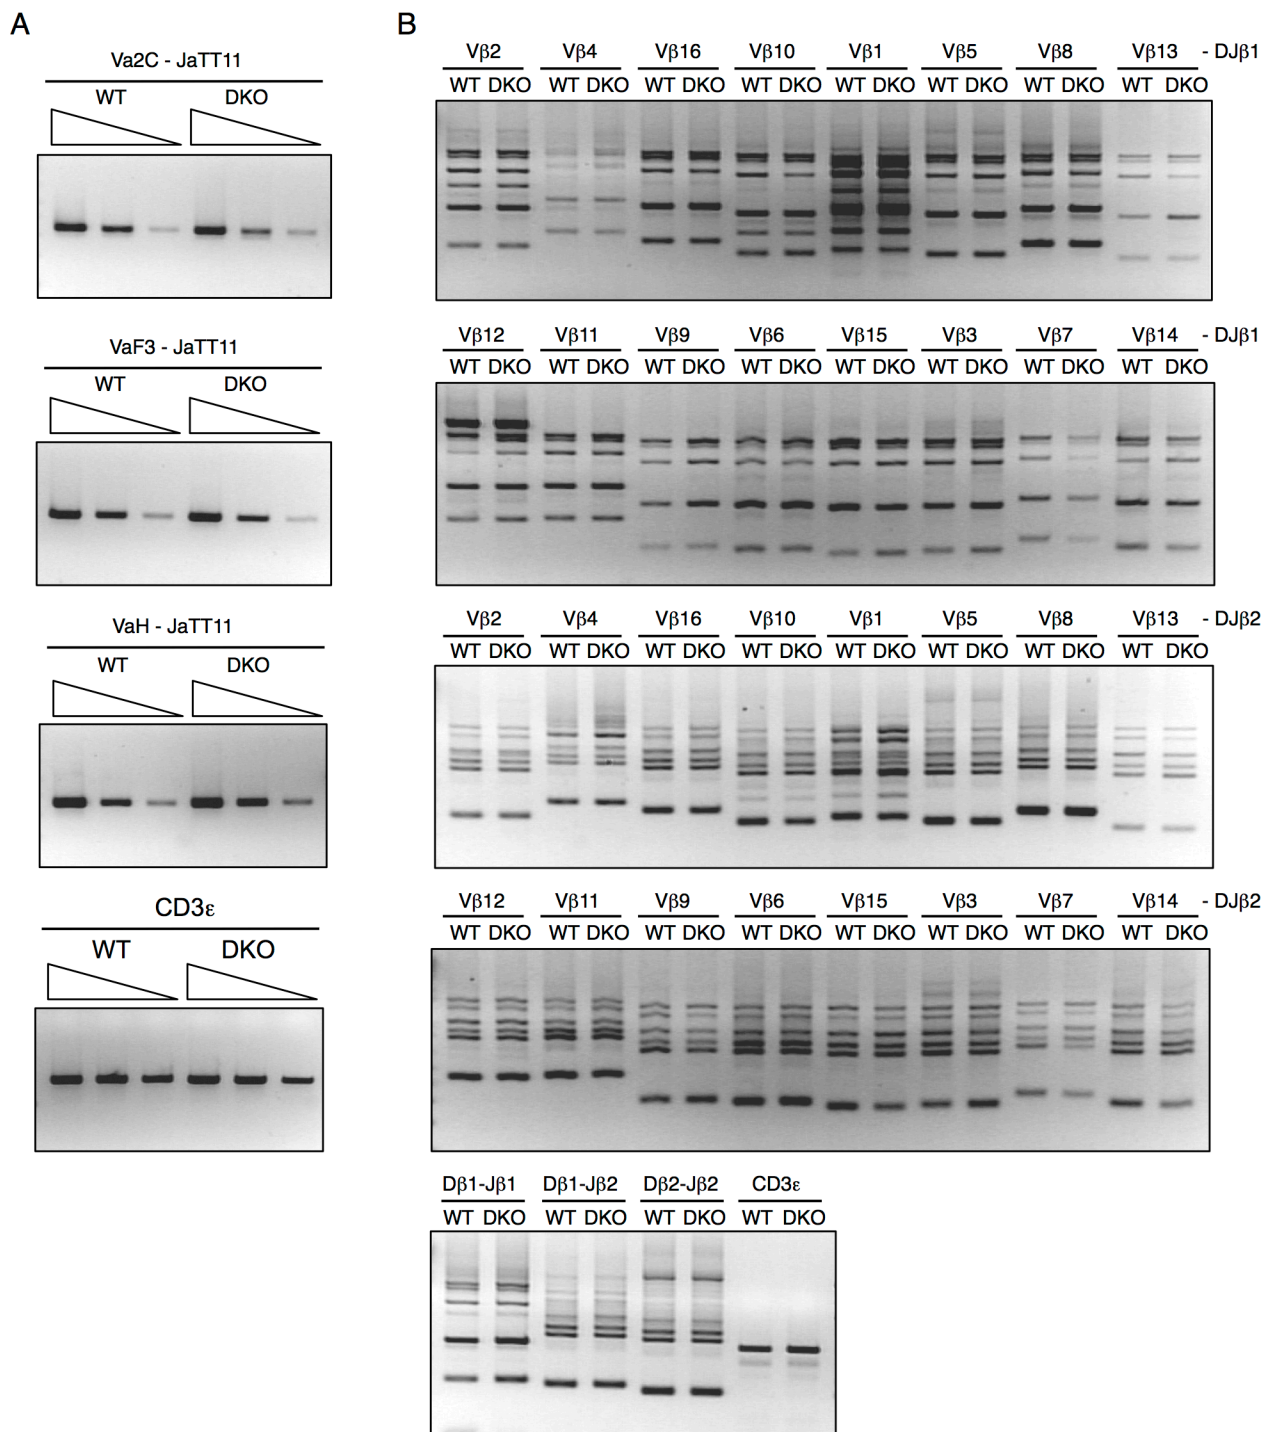

Figure S5. Related to Figure 3. *Id2*- and *Id3*-deficient DP thymocytes lack defects in TCR $\alpha$  and TCR $\beta$  gene rearrangements.

(A) PCR analysis involving TCR $\alpha$  rearrangements in DP thymocytes. Four-fold serially diluted genomic DNAs prepared from control or *Id2<sup>fl/fl</sup>Id3<sup>fl/fl</sup>IL7R<sup>Cre</sup>* DP thymocytes were analyzed for V $\alpha$ -Ja rearrangements by PCR using V $\alpha$ 2C, V $\alpha$ F3 or V $\alpha$ H upstream primers in conjunction with JaTT11 downstream primers. Equal DNA quantities were verified by PCR of the *Cd3e* gene. PCR products were visualized by ethidium bromide gel staining. Data are representative of two independent experiments. (B) PCR analysis of TCR $\alpha$  rearrangement in DP thymocytes. Genomic DNAs were analyzed for V $\beta$ -DJ $\beta$ 1, V $\beta$ -DJ $\beta$ 2, D $\beta$ 1-J $\beta$ 1, D $\beta$ 1-J $\beta$ 2 and D $\beta$ 2-J $\beta$ 2 rearrangements by PCR using V $\beta$  or D $\beta$  upstream primers in conjunction with J $\beta$ 1 or J $\beta$ 2 downstream primers.

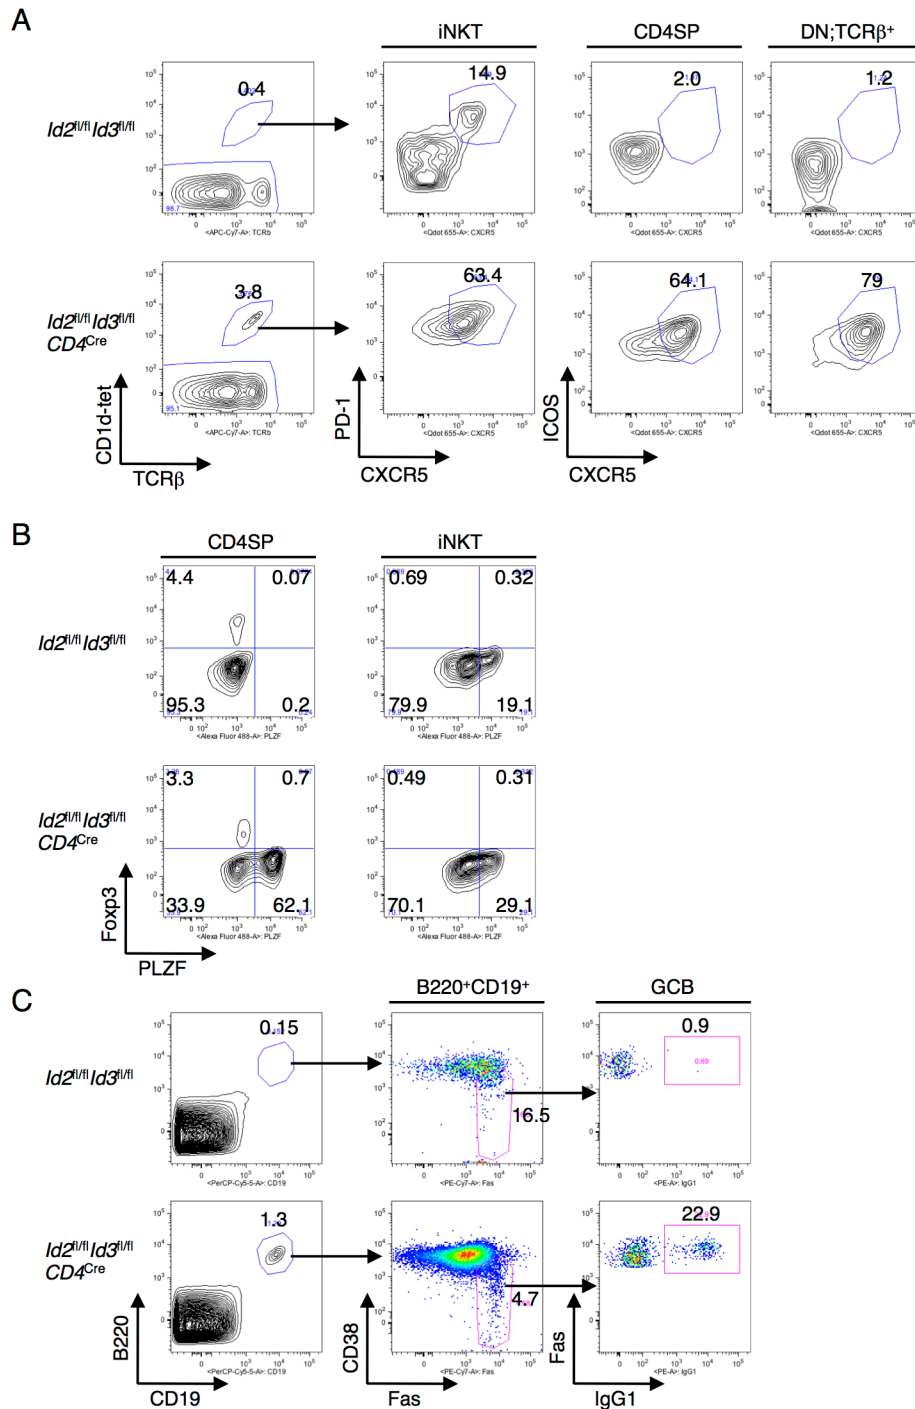

Figure S6. Related to Figure 4. Innate T<sub>FH</sub>-like cells, iNKT<sub>FH</sub> cells and increased numbers of thymic B cells in *Id2<sup>fl/fl</sup>Id3<sup>fl/fl</sup>CD4<sup>Cre</sup>* thymi.

(A) Flow cytometric analysis of TCRβ versus CD1d-tet expression in total thymocytes, CXCR5 versus PD-1 expression gated on CD1d-tet<sup>+</sup>TCRβ<sup>+</sup> iNKT cells, CXCR5 versus ICOS expression gated on CD4SP or DN;TCRβ<sup>+</sup> cells. (B) Flow cytometric analysis of PLZF versus Fxp3 expression gated on CD4SP cells and iNKT cells. (C) The expression of CD19 and B220, Fas and CD38 gated on CD19<sup>+</sup>B220<sup>+</sup> thymic B cells and IgG1 and Fas gated on Fas<sup>+</sup>CD38<sup>lo</sup> cells.

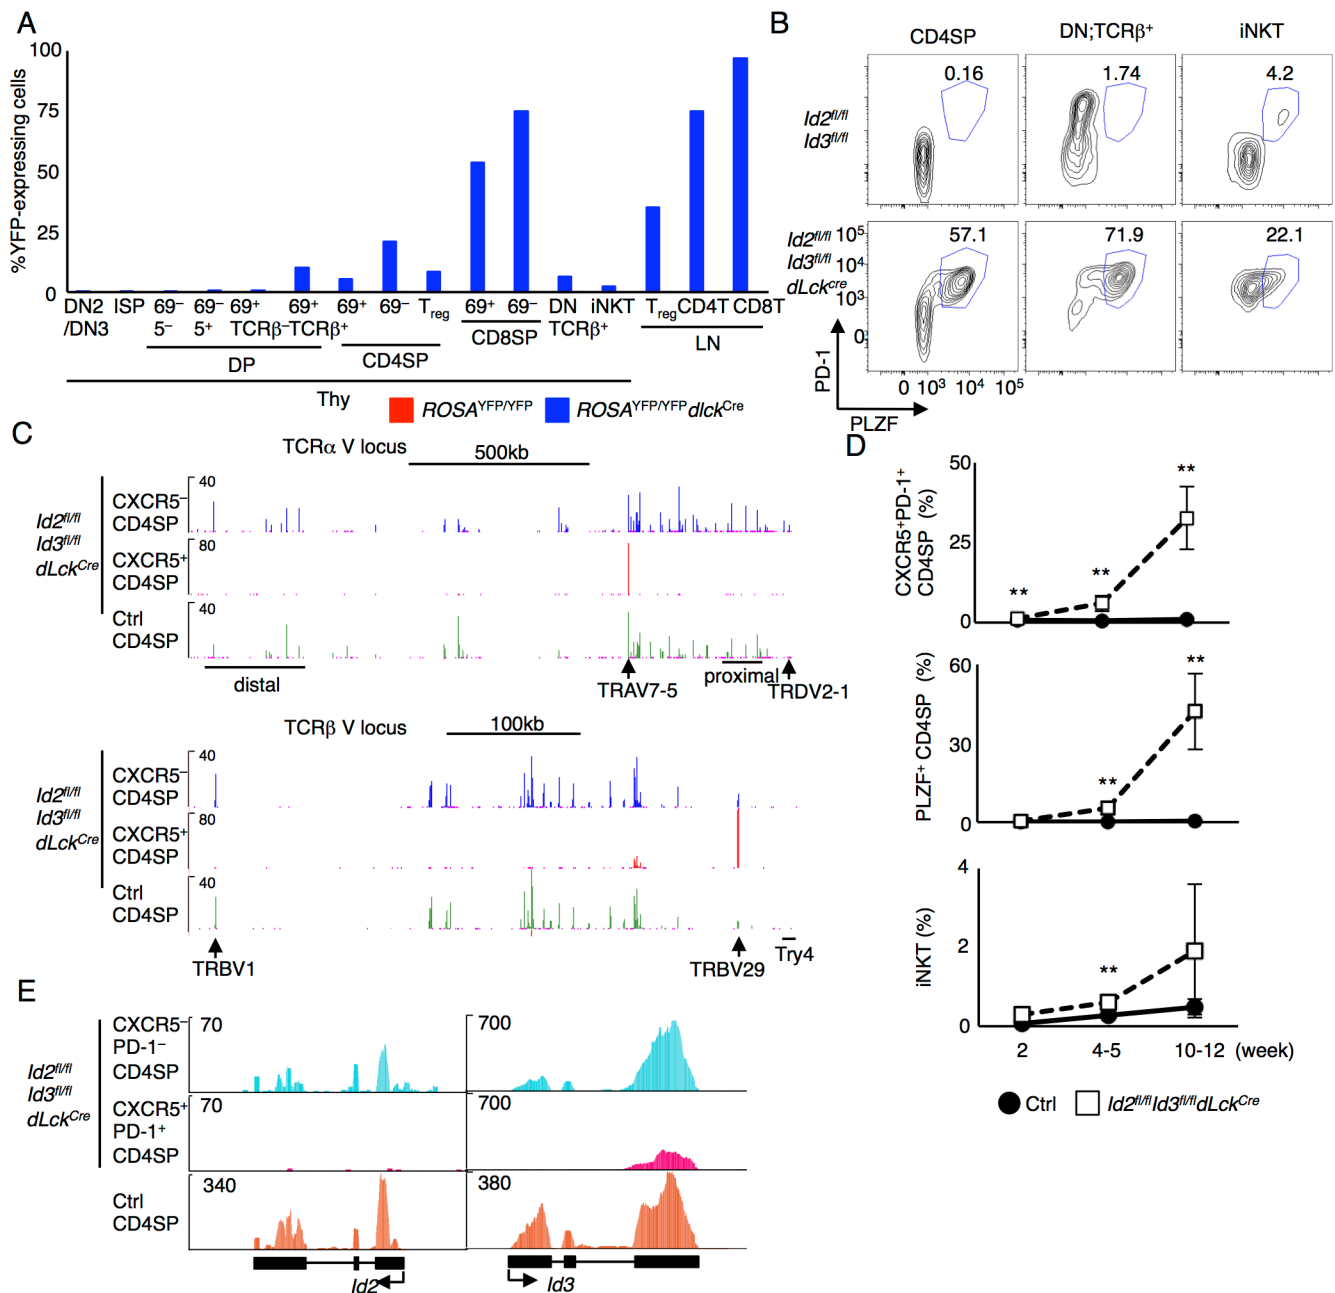

Figure S7. Related to Figure 4. *Id2* and *Id3* deletion beyond the TCR checkpoint results in the expression of CXCR5 and expansion of innate T cells. (A) Percentages of YFP-expressing cells at various stages of thymocyte development in *ROSA*<sup>YFP/YFP</sup>*dLck*<sup>Cre</sup> thymus. (B) Flow cytometric analysis of PLZF and PD-1 expression, gated on CD4SP (CD4<sup>+</sup>CD8<sup>-</sup>TCRβ<sup>+</sup>CD1d-tet<sup>-</sup>), DN;TCRβ<sup>+</sup> (CD4<sup>-</sup>CD8<sup>-</sup>TCRβ<sup>hi</sup>CD1d-tet<sup>-</sup>), and iNKT cells, derived from 10-week-old control or *Id2*<sup>fl/fl</sup>*Id3*<sup>fl/fl</sup>*dLck*<sup>Cre</sup> mouse. (C) RNA-seq analysis for TCR Vα and TCR Vβ regions in wild-type and *Id2*- and *Id3*-depleted CD4SP thymocytes. mRNA was isolated from sorted CXCR5<sup>+</sup>PD-1<sup>+</sup> CD4SP cells (middle) and CXCR5<sup>+</sup>PD-1<sup>-</sup> CD4SP cells (top) from *Id2*<sup>fl/fl</sup>*Id3*<sup>fl/fl</sup>*dLck*<sup>Cre</sup> mouse and CD4SP cells (Ctrl; bottom) from control mouse. Numbers of reads are indicated for each of the tracks. One experiment was performed. (D) Indicated are the frequencies of CXCR5<sup>+</sup>PD-1<sup>+</sup> or PLZF<sup>+</sup> cells in CD4SP cells, and iNKT cells in total thymocytes with aging. Data were derived from four independent experiments (mean ± s.d.; n = five (2-week), six (4-5-week), seven (10-12week) biological replicates). \*\*, P < 0.01 (Student's t test). (E) RNA-seq analysis across *Id2* and *Id3* loci, presented in reads per million reads aligned. RNA were isolated from sorted CXCR5<sup>+</sup>PD-1<sup>-</sup> or CXCR5<sup>+</sup>PD-1<sup>+</sup> CD4SP (CD4<sup>+</sup>CD8<sup>-</sup>TCRβ<sup>+</sup>CD1d-tet<sup>-</sup>) cells from identical *Id2*<sup>fl/fl</sup>*Id3*<sup>fl/fl</sup>*dLck*<sup>Cre</sup> mice. Arrows indicate transcriptional start site and direction of transcription.



A

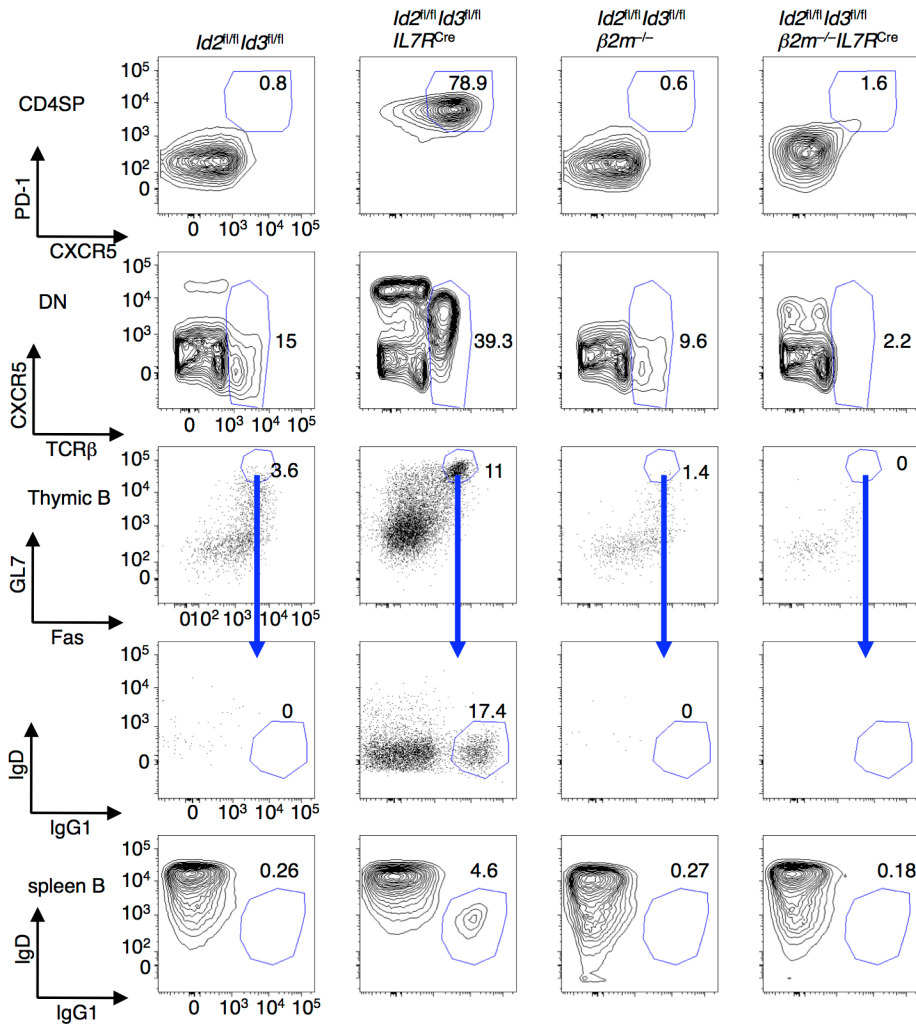

B

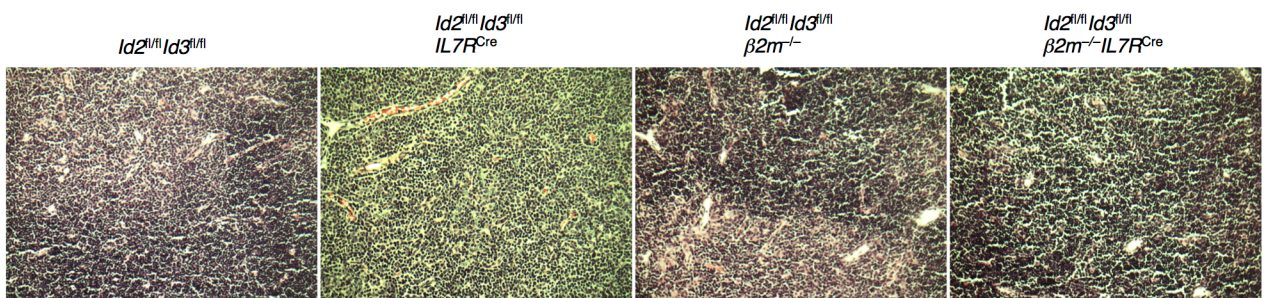

Figure S8. Related to Figure 4.  $\beta 2m$  is required for the innate  $T_{FH}$  cells and IgG1-class switched GC B cells in thymus and IgG1 class switched B cells in spleen. (A) Flow cytometric analysis of CXCR5 versus PD-1 expression, gated on CD4SP cells, TCR $\beta$  versus CXCR5 expression gated on DN cells, Fas versus GL7 expression gated on thymic B cells, IgG1 versus IgD gated on GC B cells in thymus and splenic B cells. (B) Representative H&E staining of thymus. Original magnification: x200.

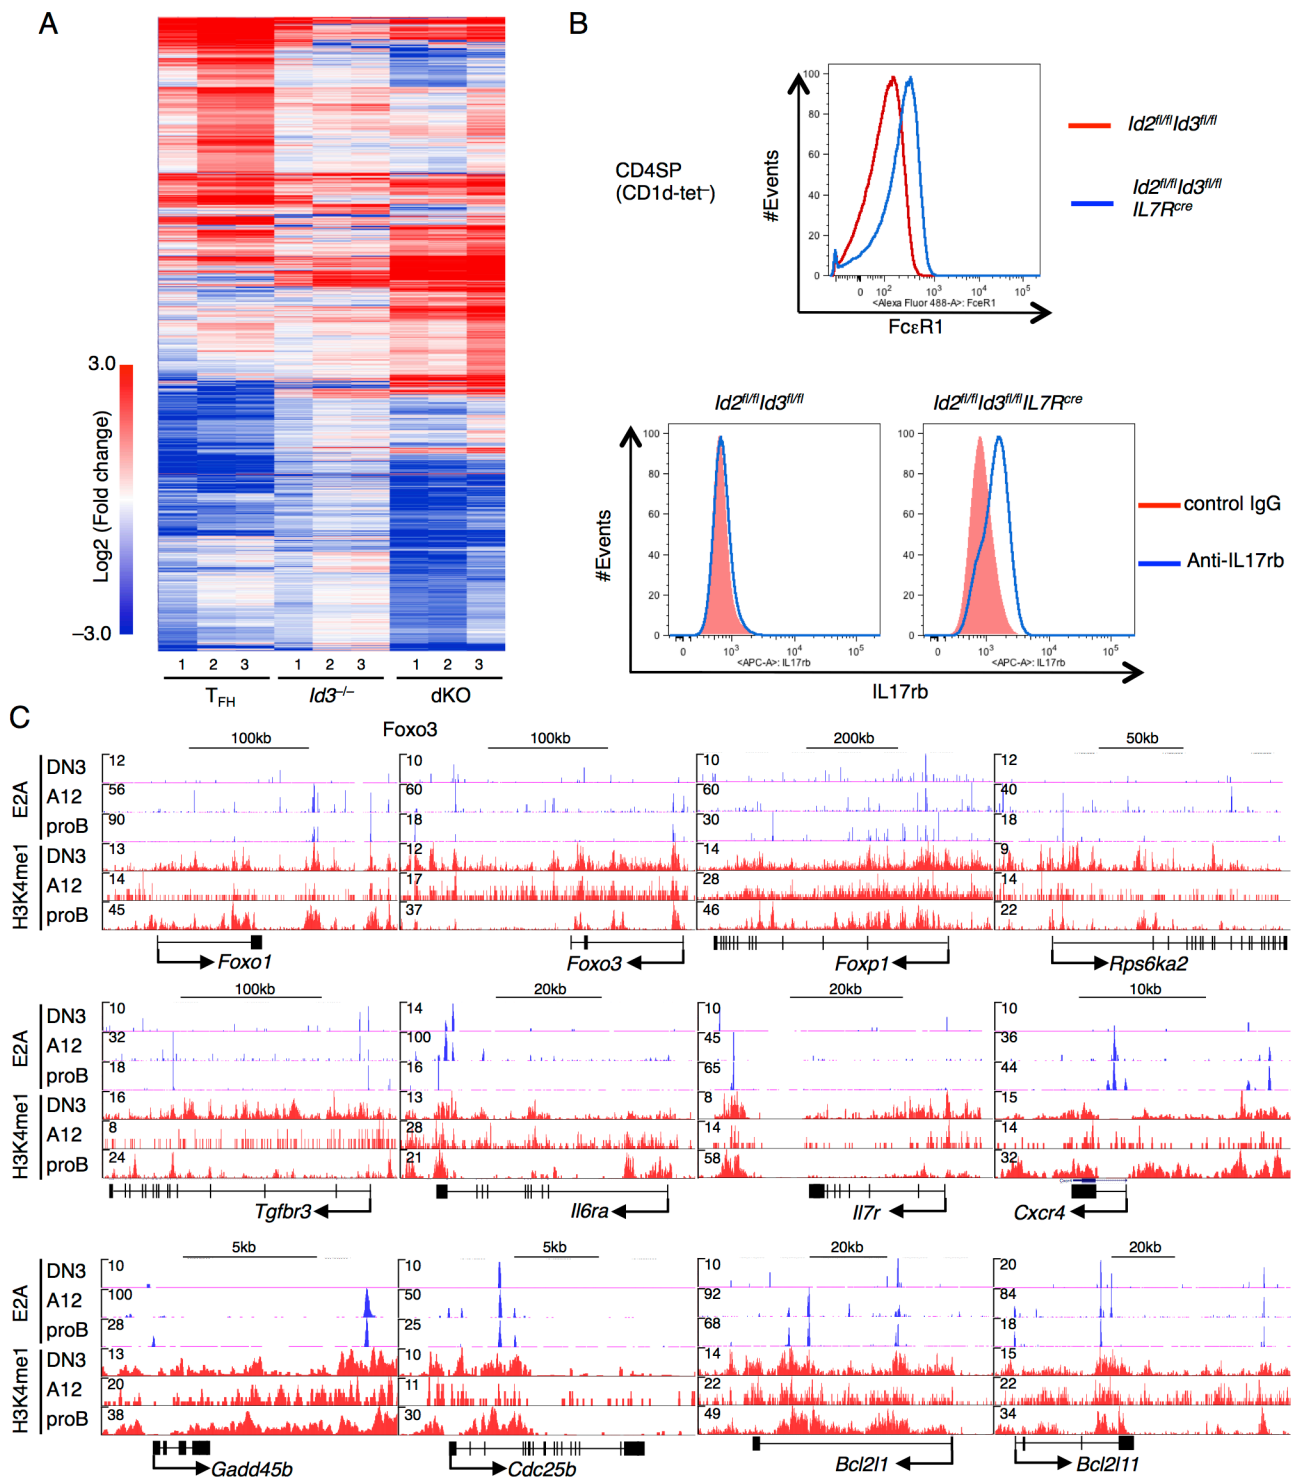

Figure S9. Related to Figure 5. Gene expression signatures of *Id2<sup>fl/fl</sup>Id3<sup>fl/fl</sup>dIck<sup>Cre</sup>* CD4SP cells and E2A regulated loci. (A) Heatmap is displayed for significantly differentially expressed genes in T<sub>FH</sub> cells, *Id3<sup>-/-</sup>* CD4SP and *Id2<sup>fl/fl</sup>Id3<sup>fl/fl</sup>IL7R<sup>Cre</sup>* CD4SP cells, compared to control CD4SP cells (3601 genes; > twofold, *P* < 0.05). (B) Flow cytometric analysis of FcεR1 and IL-17rb expression, gated on CD4SP (CD4<sup>+</sup>CD8<sup>-</sup>TCRβ<sup>hi</sup>CD1d-tet<sup>+</sup>) cells. (C) E2A occupancy and deposition of H3K4me1 across the *Foxo1*, *Foxo3*, *Foxp1*, *Rps6ka2*, *Tgfb3*, *Il6ra*, *Il7r*, *Cxcr4*, *Gadd45b*, *Cdc25b*, *Bcl2l1*, and *Bcl2l11* loci in DN3, A12 and pro-B cells. Numbers in plots indicate total tags observed. DN3 cells; *Rag2<sup>-/-</sup>* thymocytes, A12 cells; *E2a<sup>-/-</sup>* E47 reconstituted T cell line, pro-B cells; *Rag2<sup>-/-</sup>* bone marrow B cells. Arrows indicate transcriptional start site and direction of transcription.

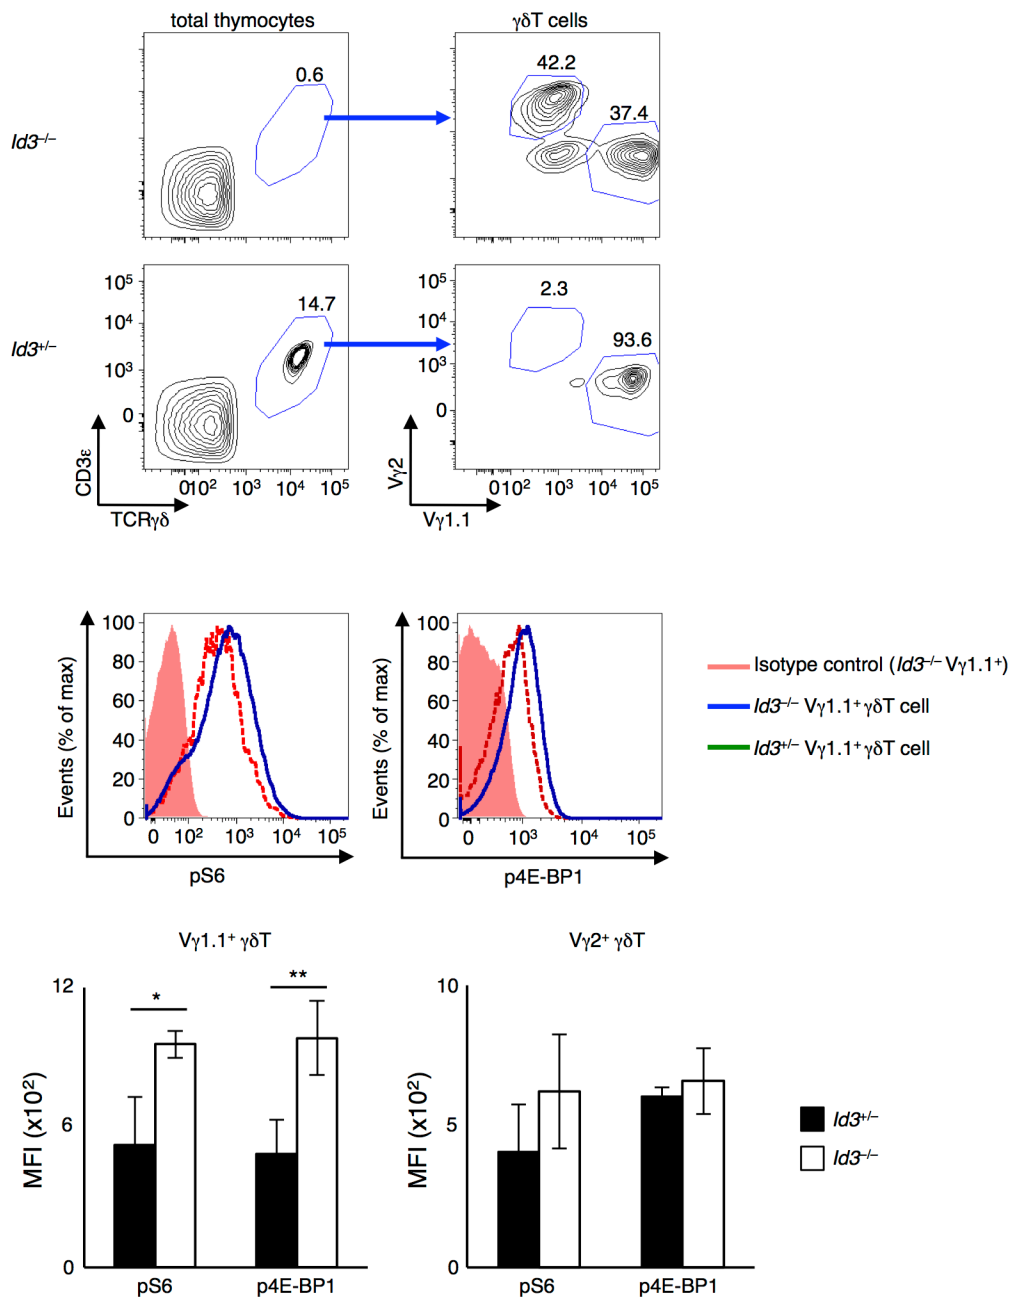

Figure S10. Related to Figure 6. Higher level of mTORC1 activity in Vγ1.1<sup>+</sup> innate γδT cells, but not in Vγ2<sup>+</sup> cells, in *Id3*<sup>-/-</sup> thymus.

Flow cytometric analysis of TCRγδ versus CD3ε expression in total thymocytes, and Vγ1.1 versus Vγ2 expression gated on γδT cells, derived from *Id3*<sup>+/-</sup> and *Id3*<sup>-/-</sup> thymus (top). Phospho-S6 and -4E-BP1 expression gated Vγ1.1<sup>+</sup> γδT cells derived from *Id3*<sup>+/-</sup> and *Id3*<sup>-/-</sup> thymus (middle). Graph shows the level of phosphorylated S6 and 4E-BP1, presented as MFI. Data are representative of three independent experiments (mean ± s.d.; *n* = three biological replicates). ★, *P* < 0.05, ★★, *P* < 0.01 (Student's *t* test).

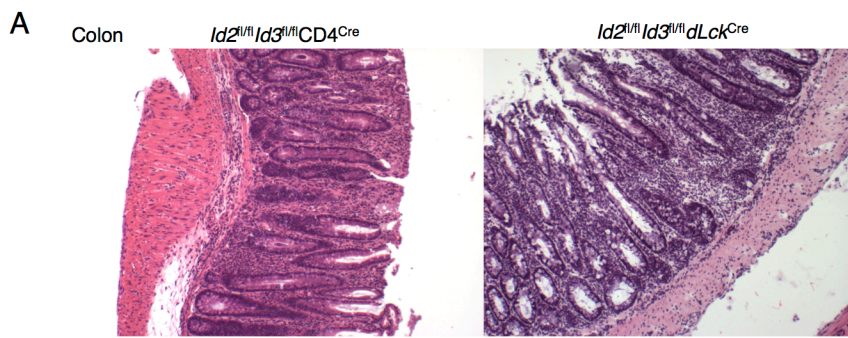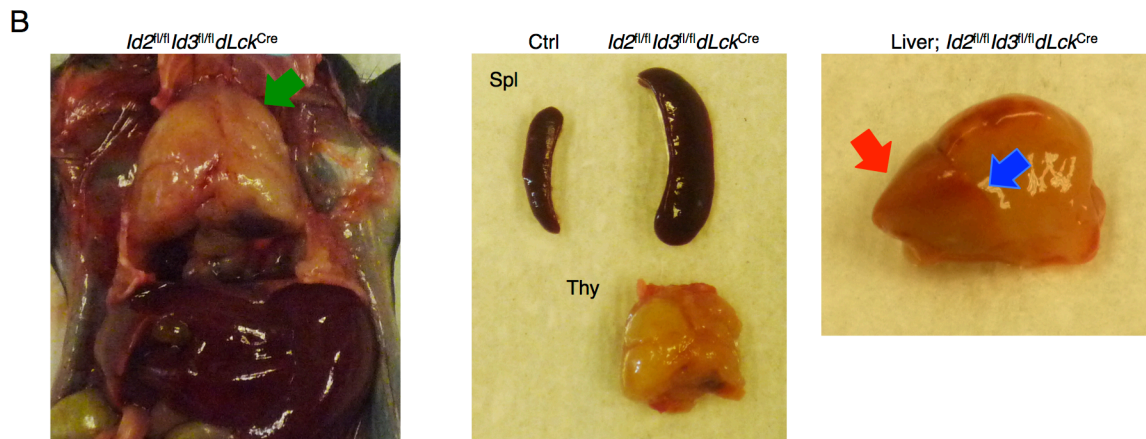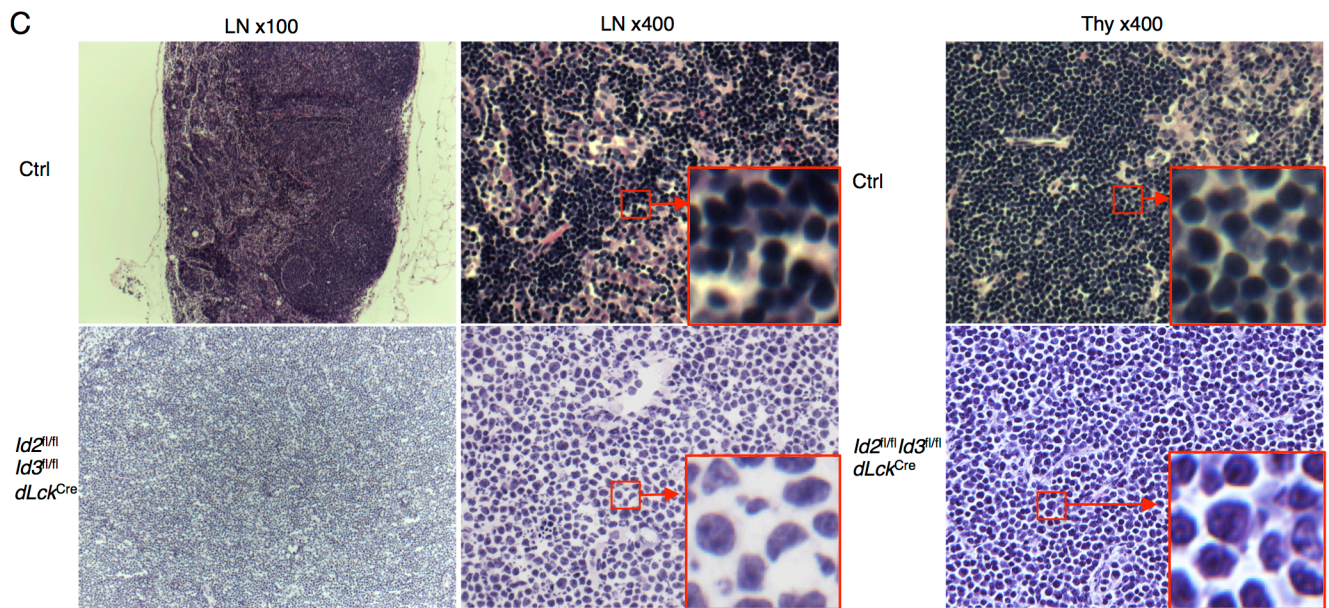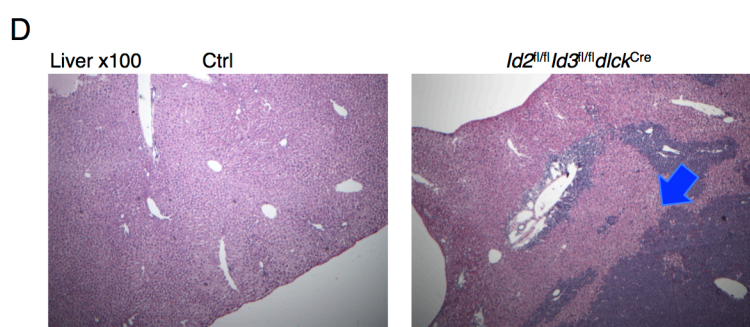

E

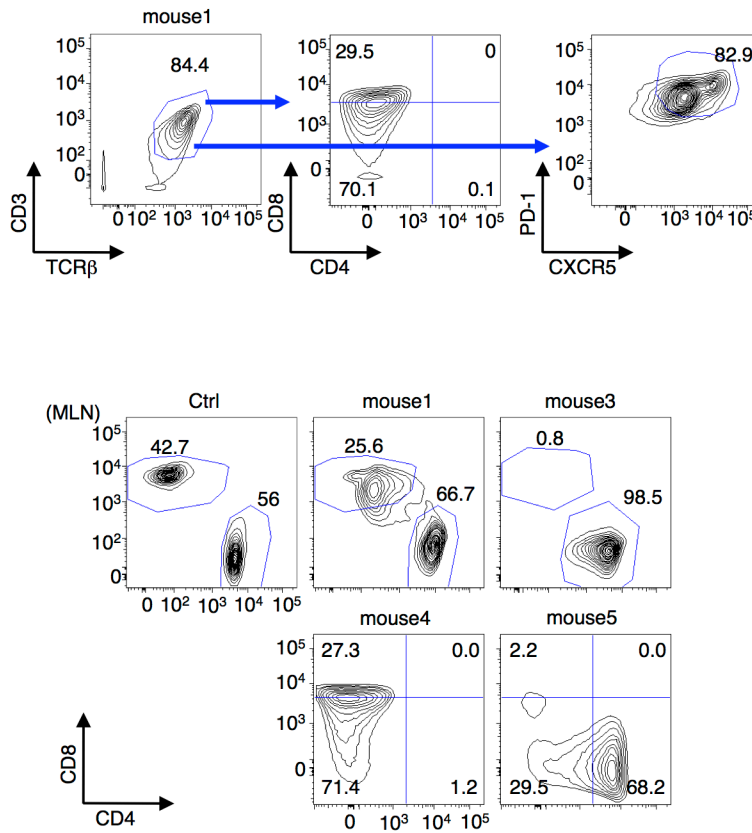

Figure S11. Related to Figure 7. Histological analysis of T cell lymphoma in *Id2<sup>fl/fl</sup>Id3<sup>fl/fl</sup>IL7R<sup>Cre</sup>/CD4<sup>Cre</sup>/dLck<sup>Cre</sup>* mice.

(A) H&E staining of large intestine derived from *Id2<sup>fl/fl</sup>Id3<sup>fl/fl</sup>CD4<sup>Cre</sup>/dLck<sup>Cre</sup>* mice. Original magnification: x100. (B) Images of thymus, spleen, and liver derived from 12-month-old *Id2<sup>fl/fl</sup>Id3<sup>fl/fl</sup>dLck<sup>Cre</sup>* mouse. Green arrow indicates thymic lymphoma. Blue arrow indicates infiltration of lymphoma cells in the liver. Red arrow indicates normal liver tissue. (C) H&E staining of LNs and thymus. (D) H&E staining of liver isolated from control and *Id2<sup>fl/fl</sup>Id3<sup>fl/fl</sup>dLck<sup>Cre</sup>* mice, as seen in Figure S11B. Blue arrow indicates the border between lymphoma cell invasion and normal liver tissue. (E) Flow cytometric analysis of TCRβ versus CD3<sub>ε</sub> expression in thymic lymphoma cells, CD4 versus CD8, CXCR5 versus PD-1 expression gated on TCRβ<sup>+</sup>CD3<sub>ε</sub><sup>+</sup> lymphoma cells (top). CD4 and CD8 expression gated on TCRβ<sup>+</sup>CD3<sub>ε</sub><sup>+</sup> T cells (Ctrl) and lymphoma cells derived from *Id2<sup>fl/fl</sup>Id3<sup>fl/fl</sup>CD4<sup>Cre</sup>/dLck<sup>Cre</sup>* mesenteric LNs.

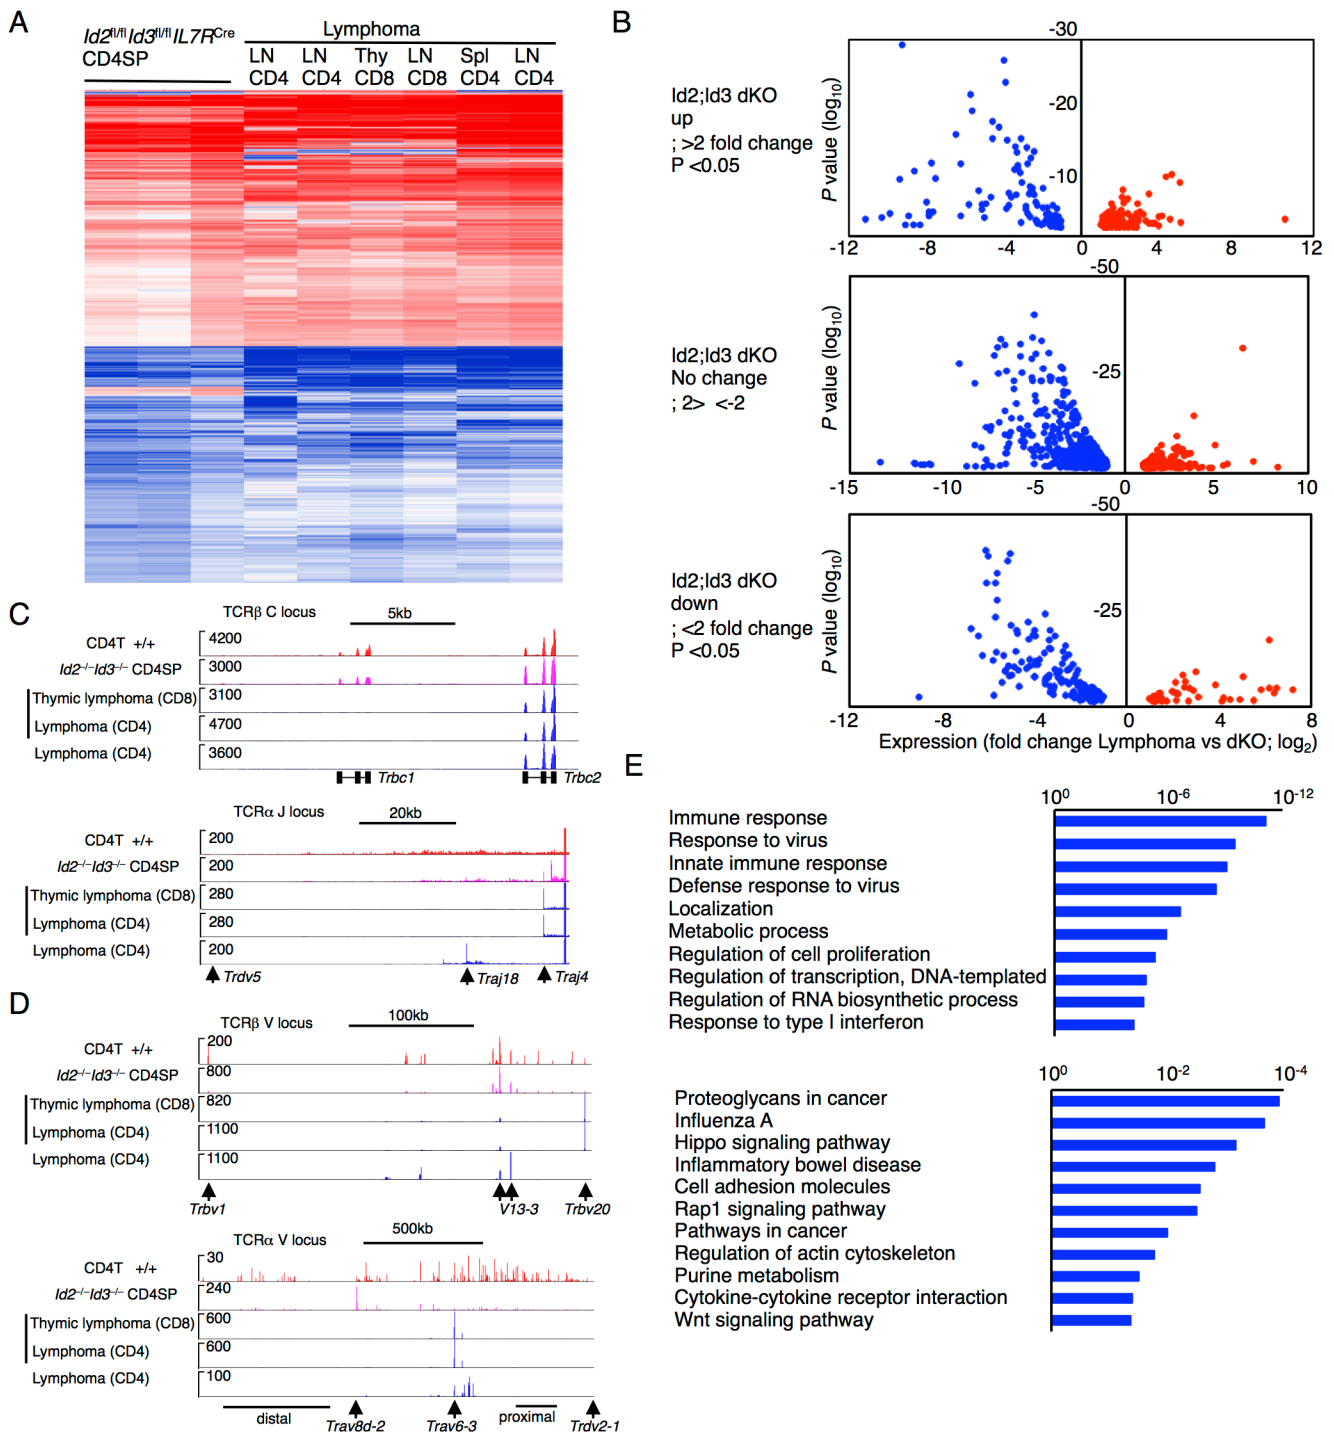

Figure S12. Related to Figure 7. Transcription signatures of *Id2*- and *Id3*-deficient T cell lymphomas. (A) Heatmap is displayed for significantly differentially expressed genes between *Id2<sup>fl/fl</sup>Id3<sup>fl/fl</sup>IL7R<sup>Cre</sup>* CD4SP cells and lymphoma cells (2122 genes; >twofold,  $P < 0.05$ , any >10). (B) Volcano plots of RNA-seq analysis. Genes significantly differentially expressed between *Id2<sup>fl/fl</sup>Id3<sup>fl/fl</sup>IL7R<sup>Cre</sup>* CD4SP cells and lymphoma cells were further compared to control CD4SP cells, control CD4 T cells, and CD8 T cells. Then, those genes were classified into three groups, based on the expression in *Id2<sup>fl/fl</sup>Id3<sup>fl/fl</sup>IL7R<sup>Cre</sup>* CD4SP cells compared to control CD4SP cells as seen in Figure 5A. (C-D) RNA-seq analysis across *Trbc1/Trbc2* and *Tra* loci (C) and TCRβ V, and TCRα V loci. (E) Selected biological process GO (Gene Ontology) terms (top), KEGG pathways (bottom) and their associated  $P$ -values are shown.

A

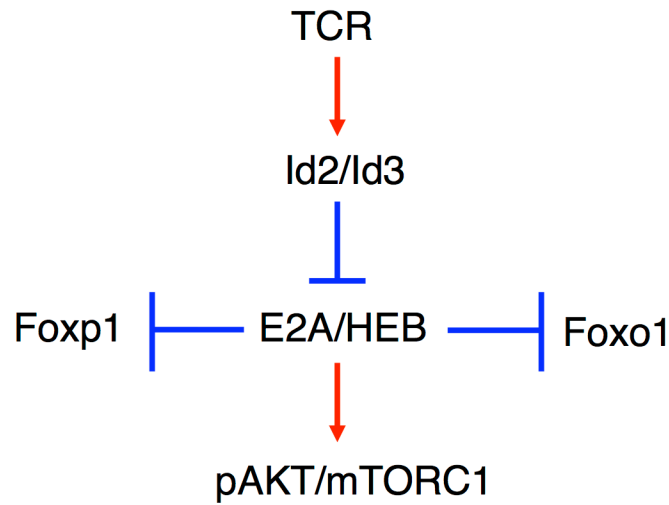

B

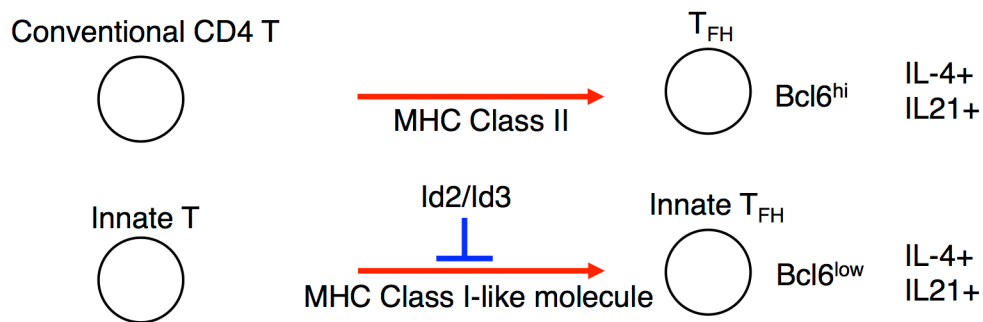

C

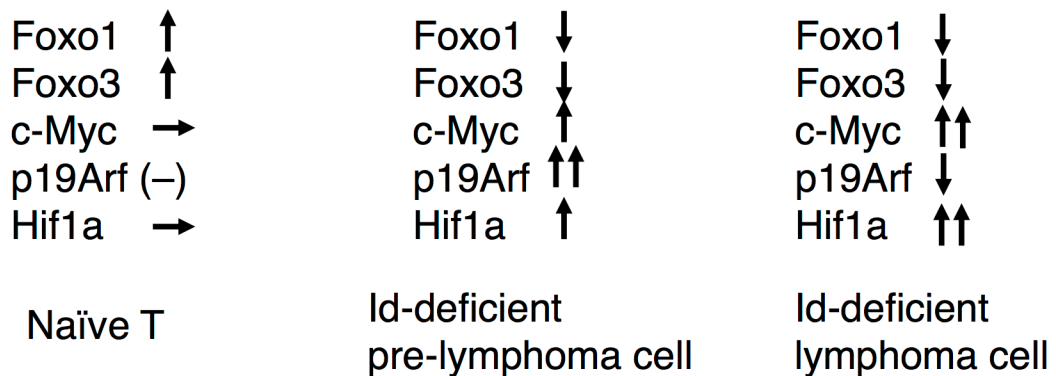

Figure S13. Related to Discussion. Models depicting the roles of Id2 and Id3. (A) Genetic circuitry involving Id-proteins and the AKT-FoxO-mTOR pathway. (B) Schematic diagram that displays the role of Id2 and Id3 in suppressing the development of innate variant  $T_{FH}$  cells. (C) Intermediate steps in Id-deficient lymphoma genesis characterized by modulating the expression of genes associated with lymphoid cell growth and malignancy.

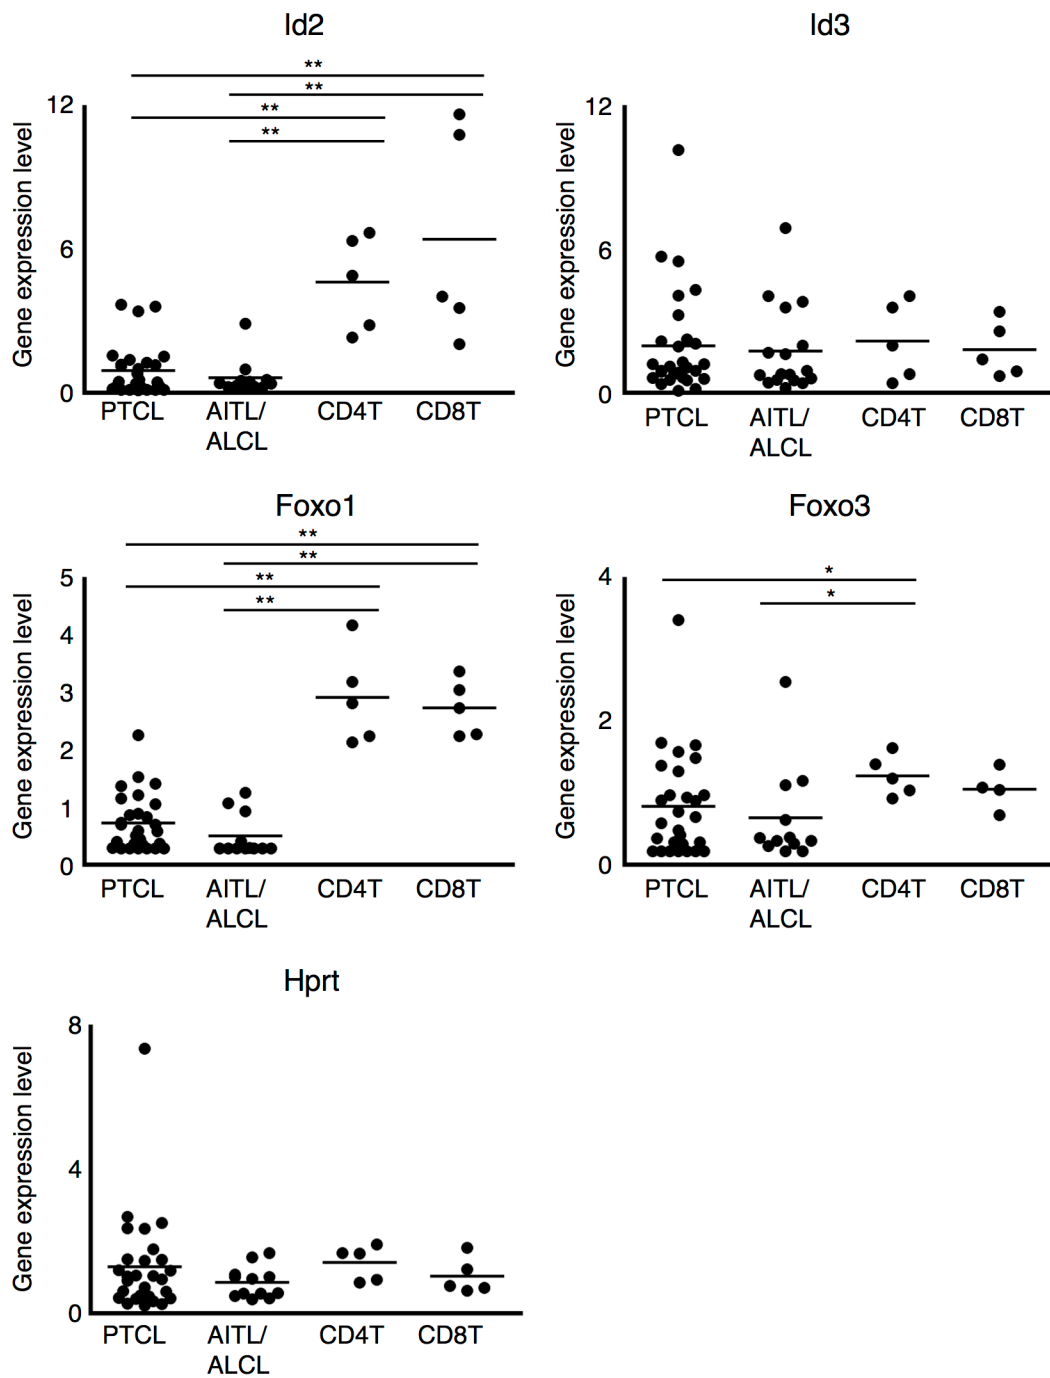

Figure S14. Related to Discussion. *Id2*, *Id3*, *Foxo1*, *Foxo3*, and *Hprt* expression in human T cell lymphoma. PTCL; peripheral T cell lymphoma / unspecified, AITL; Angioimmunoblastic T lymphoma, ALCL; Anaplastic large cell lymphoma. The expressions of selected genes were performed by using microarray data previously reported (Picculga et al. 2007)
